# Supplementary material for: Central and peripheral myeloid-derived suppressor cell-like cells are closely related to the clinical severity of multiple sclerosis
Source: PubMed Central journal article supplement (PMC10329064; doi:10.1007/s00401-023-02593-x), 2023-05-27
Supplement: 401_2023_2593_MOESM1_ESM.pdf [file 401_2023_2593_MOESM1_ESM.pdf]

**a**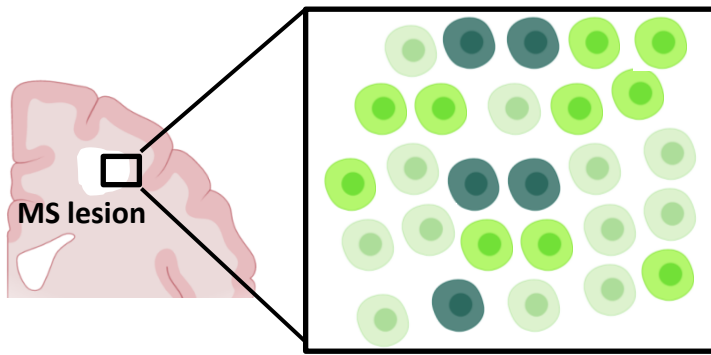

### Quantification of HLA-DR fluorescence intensity

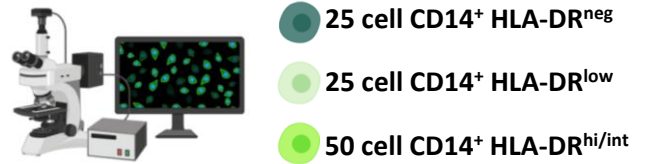

ROC curve analysis

↓

Cut-off value of maximum HLA-DR fluorescence intensity to identified HLA-DR<sup>low</sup> cells and quantified the density CD14<sup>+</sup> HLA-DR<sup>-/low</sup>

**b**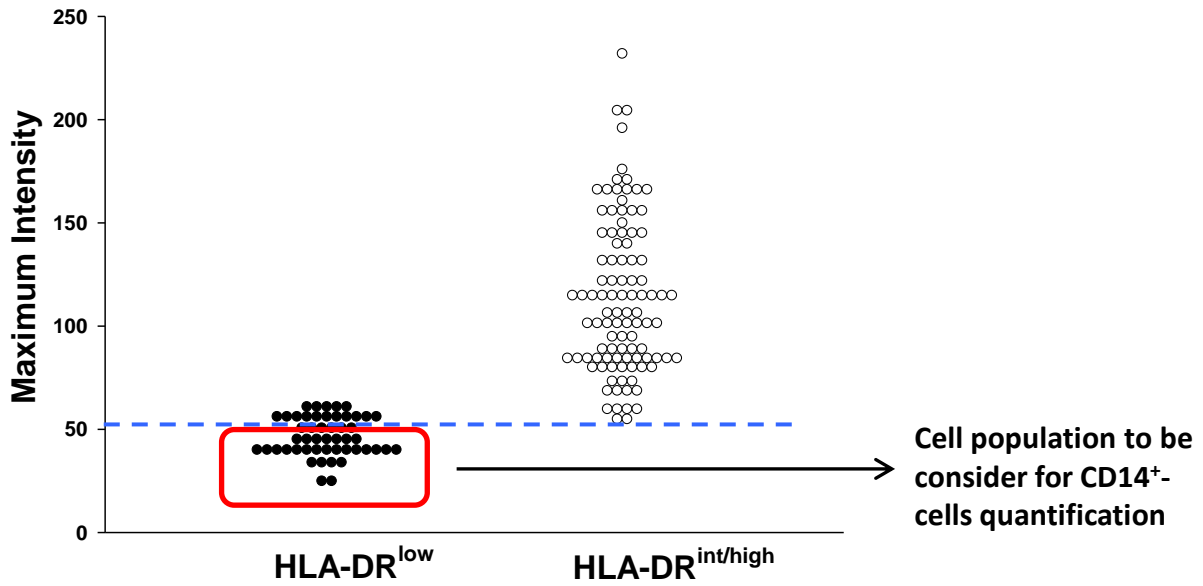

Suppl. Figure 1

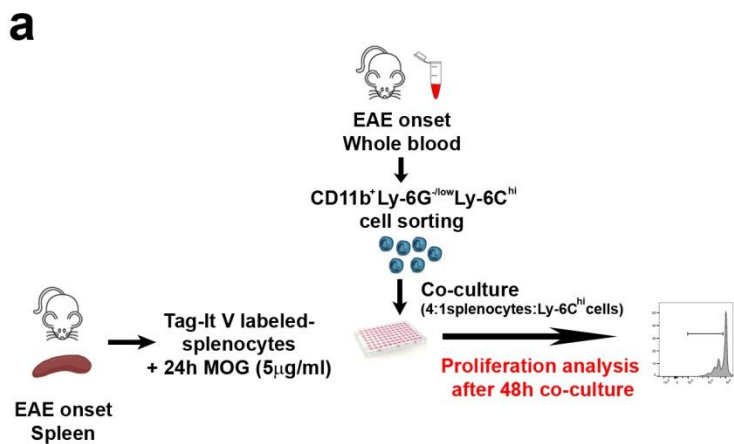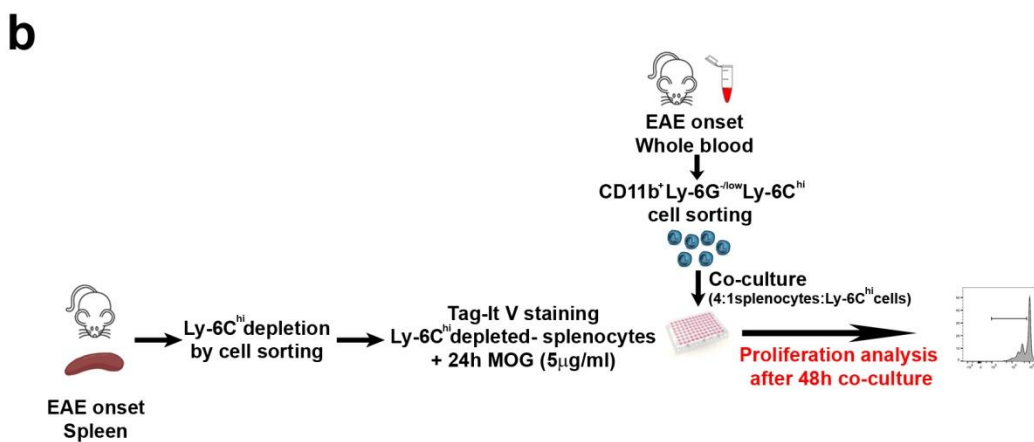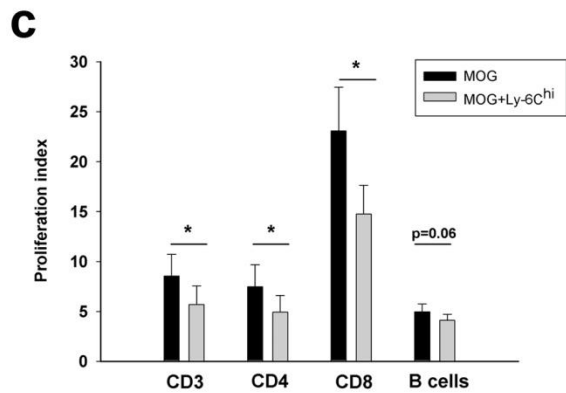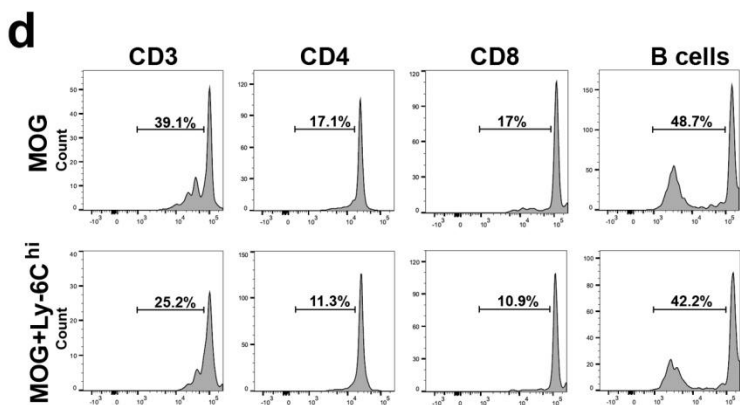

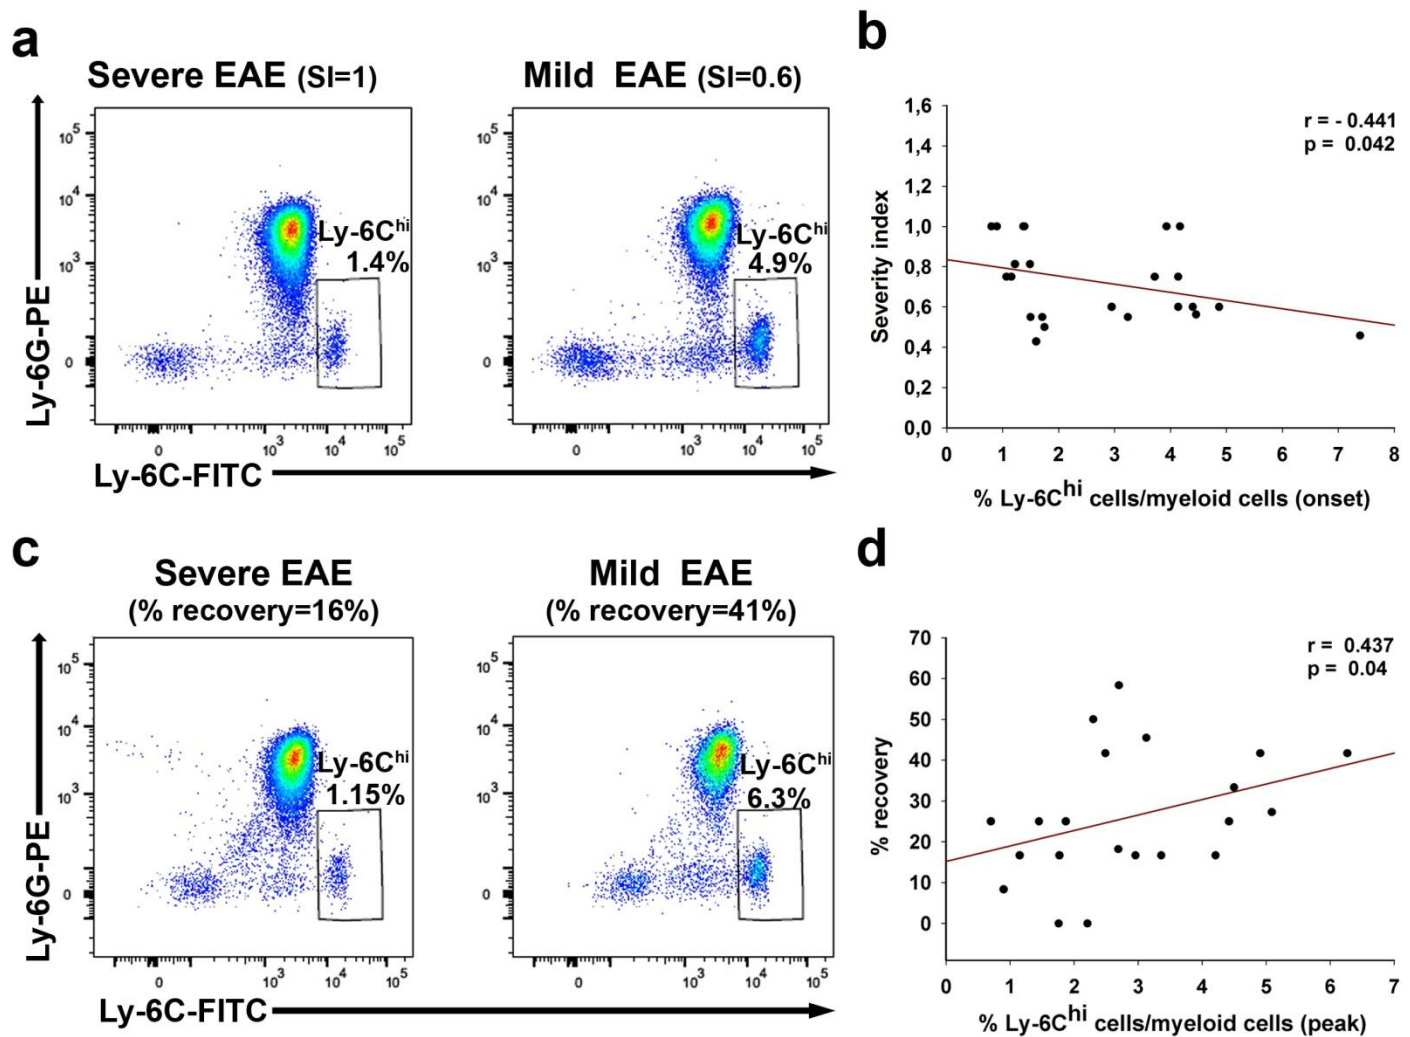

Suppl. Fig. 3

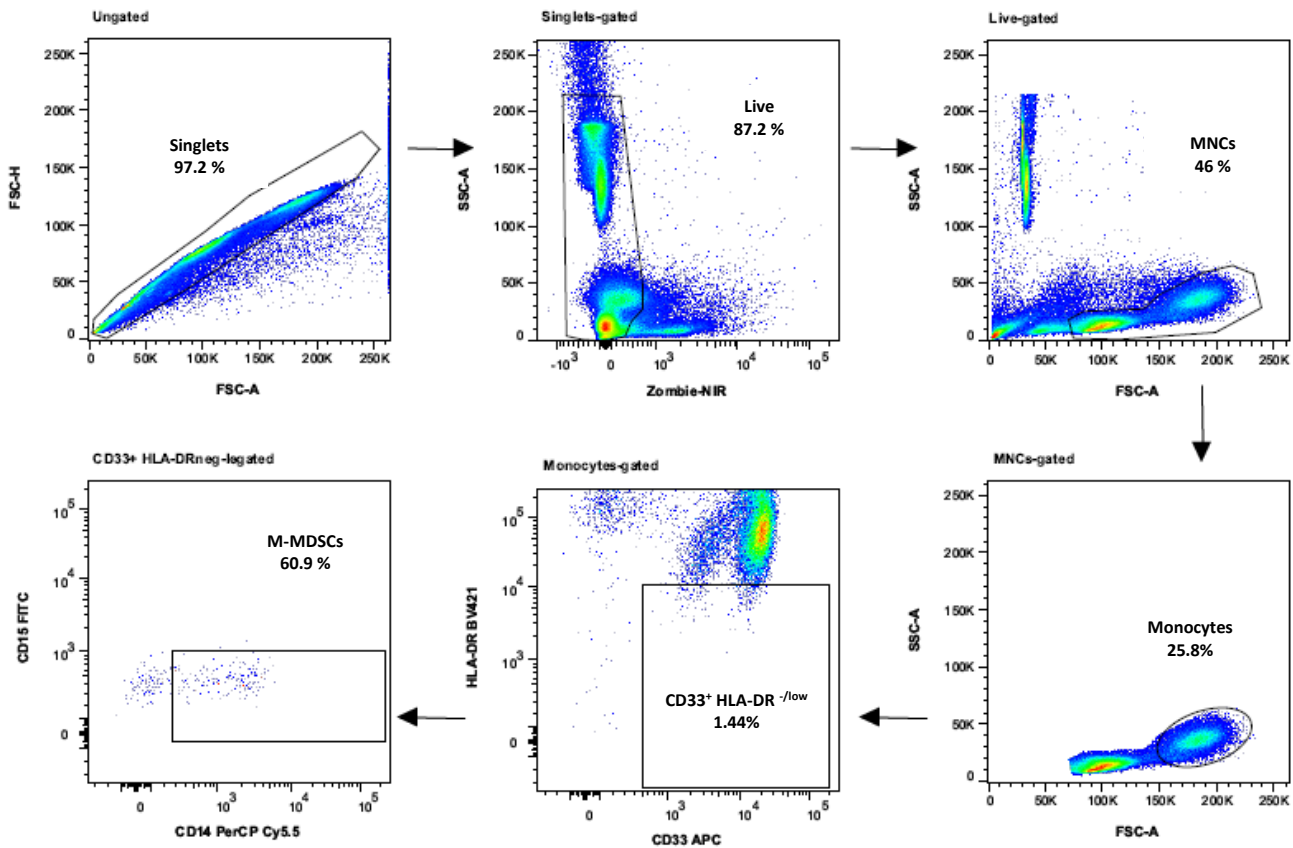

Suppl. Fig. 4

**Suppl. Table 1. Demographic table of the MS patients enrolled for the PMBC follow up study**

| <b>Epidemiological data</b>      | <b>All MS patients<br/>n = 47</b> | <b>MS ≤30 days<br/>n = 30</b> | <b>MS &gt;30 days<br/>n = 17</b> | <b>HC<br/>n = 26</b> |
|----------------------------------|-----------------------------------|-------------------------------|----------------------------------|----------------------|
| <b>Age<sup>a</sup></b>           | 36.86 (9.03)                      | 35.13 (9.44)                  | 39.11 (8.12)                     | 34.77 (10.28)        |
| <b>Male/female (%female)</b>     | 15/32 (68.09)                     | 10/20 (66.66)                 | 5/12 (70.59)                     | 12/14 (53.84)        |
| <b>EDSS baseline<sup>b</sup></b> | 3 (2-4)                           | 3 (3-4)                       | 1.75 (1-2)                       | NA                   |
| <b>EDSS 12m<sup>b</sup></b>      | 1 (0-2)                           | 0.5 (0-1)                     | 1 (0-2)                          | NA                   |
| <b>Gd+ lesions</b>               |                                   |                               |                                  |                      |

HC: Healthy controls. <sup>a</sup> = mean ± SD. <sup>b</sup> = median ± interquartile range. NA: Not applicable.

**Suppl.Table 2 Clinical and demographic data of MS followed up patients**

| <b>Patient ID</b> | <b>Age</b> | <b>Sex</b> | <b>Time since relapse (days)</b> | <b>Treatment during follow-up</b> | <b>EDSS baseline</b> | <b>EDSS 12 months</b> | <b>MDSCs/MNCs baseline</b> | <b>MDSCs/MNCs 12 months</b> |
|-------------------|------------|------------|----------------------------------|-----------------------------------|----------------------|-----------------------|----------------------------|-----------------------------|
| <b>I</b>          | 44         | F          | 10                               | ---                               | 2                    | 0                     | 2.67                       | 1.62                        |
| <b>II</b>         | 23         | M          | 8                                | R                                 | 2                    | 0                     | 2.27                       | 0.92                        |
| <b>III</b>        | 51         | F          | 22                               | DF                                | 4                    | 1                     | 0.52                       | 0.87                        |
| <b>IV</b>         | 24         | F          | 6                                | Cpx                               | 3                    | 0                     | 2.00                       | 3.47                        |
| <b>V</b>          | 30         | M          | 5                                | Cc/DF                             | 3                    | 0                     | 0.82                       | 1.69                        |
| <b>VI</b>         | 50         | F          | 21                               | Cc/DF                             | 3.5                  | 3                     | 1.41                       | 4.05                        |
| <b>VII</b>        | 32         | F          | 33                               | Cc/Hf                             | 4                    | 0                     | 2.32                       | 3.14                        |
| <b>VIII</b>       | 42         | F          | 10                               | Cc/Hf/Cpx                         | 5                    | 4                     | 0.7                        | 0.28                        |
| <b>IX</b>         | 40         | F          | 32                               | Cc/DF                             | 4                    | 3                     | 0.07                       | 7.34                        |
| <b>X</b>          | 44         | F          | 19                               | Cc/Cdb                            | 4                    | 0                     | 0.72                       | 0.89                        |
| <b>XI</b>         | 30         | F          | 12                               | Cc/DF                             | 4                    | 1                     | 0.36                       | 0.88                        |
| <b>XII</b>        | 42         | M          | 21                               | Cc                                | 3                    | 2                     | 0.74                       | 2.79                        |
| <b>XIII</b>       | 39         | F          | 6                                | Hf                                | 4                    | 1                     | 1.38                       | 1.48                        |
| <b>XIV</b>        | 23         | M          | 11                               | Cc/DF                             | 4                    | 0                     | 0.15                       | 1.11                        |
| <b>XV</b>         | 57         | F          | 16                               | Cc                                | 3                    | 0                     | 0.76                       | 1.59                        |
| <b>XVI</b>        | 37         | M          | 17                               | Df                                | 3                    | 0                     | 1.41                       | 7.71                        |
| <b>XVII</b>       | 29         | M          | 13                               | Cc/DF/Hf                          | 3                    | 0                     | 2.46                       | 0.31                        |
| <b>XVIII</b>      | 37         | M          | 14                               | Cc/DF                             | 3                    | 1                     | 0.06                       | 2.54                        |
| <b>XIX</b>        | 32         | M          | 16                               | Cc/DF                             | 3                    | 0                     | 1.37                       | 5.26                        |
| <b>XX</b>         | 30         | F          | 30                               | Cc/PG                             | 3                    | 1                     | 1.11                       | 1.44                        |
| <b>XXI</b>        | 36         | F          | 12                               | Cc/DF                             | 2                    | 0                     | 1.85                       | 6.53                        |
| <b>XXII</b>       | 16         | F          | 5                                | Ntz                               | 3                    | 2                     | 0.30                       | 1.09                        |
| <b>XXIII</b>      | 24         | M          | 9                                | DF                                | 2                    | 0                     | 3.39                       | 0.95                        |
| <b>XXIV</b>       | 36         | F          | 9                                | Ntz                               | 4                    | 1                     | 3.44                       | 6.16                        |
| <b>XXV</b>        | 39         | F          | 8                                | If                                | 5                    | 1                     | 1.7                        | 1.27                        |
| <b>XXVI</b>       | 35         | F          | 6                                | Atz                               | 1                    | 0                     | 3.7                        | 8.22                        |
| <b>XXVII</b>      | 43         | F          | 7                                | ---                               | 2                    | 1                     | 3.82                       | 2.30                        |
| <b>XXVIII</b>     | 35         | F          | 14                               | Tf                                | 5                    | 1.5                   | 0.14                       | 4.73                        |
| <b>XXIX</b>       | 21         | M          | 9                                | Tf                                | 3                    | 0                     | 0.67                       | 0.71                        |
| <b>XXX</b>        | 34         | F          | 6                                | Cc/DF                             | 3                    | 3.5                   | 1.02                       | 0.97                        |

**Abbreviations:** Atz: Alemtuzumab Cc: corticosteroids; Cdb: Cladribina; Cpx: Copaxone; DF: Dimethyl Fumarate; Hf: Hydroferol; If: Interferon; R: Rebif 44; Ntz: Natalizumab; PG: Plegridy; Tf: Teriflunomide.
